# Supplementary material for: Astrocytic metabolic switch is a novel etiology for Cocaine and HIV-1 Tat-mediated neurotoxicity
Source: PubMed Central journal article supplement (PMC5856787; doi:10.1038/s41419-018-0422-3), 2018-03-16

**Figure S1**

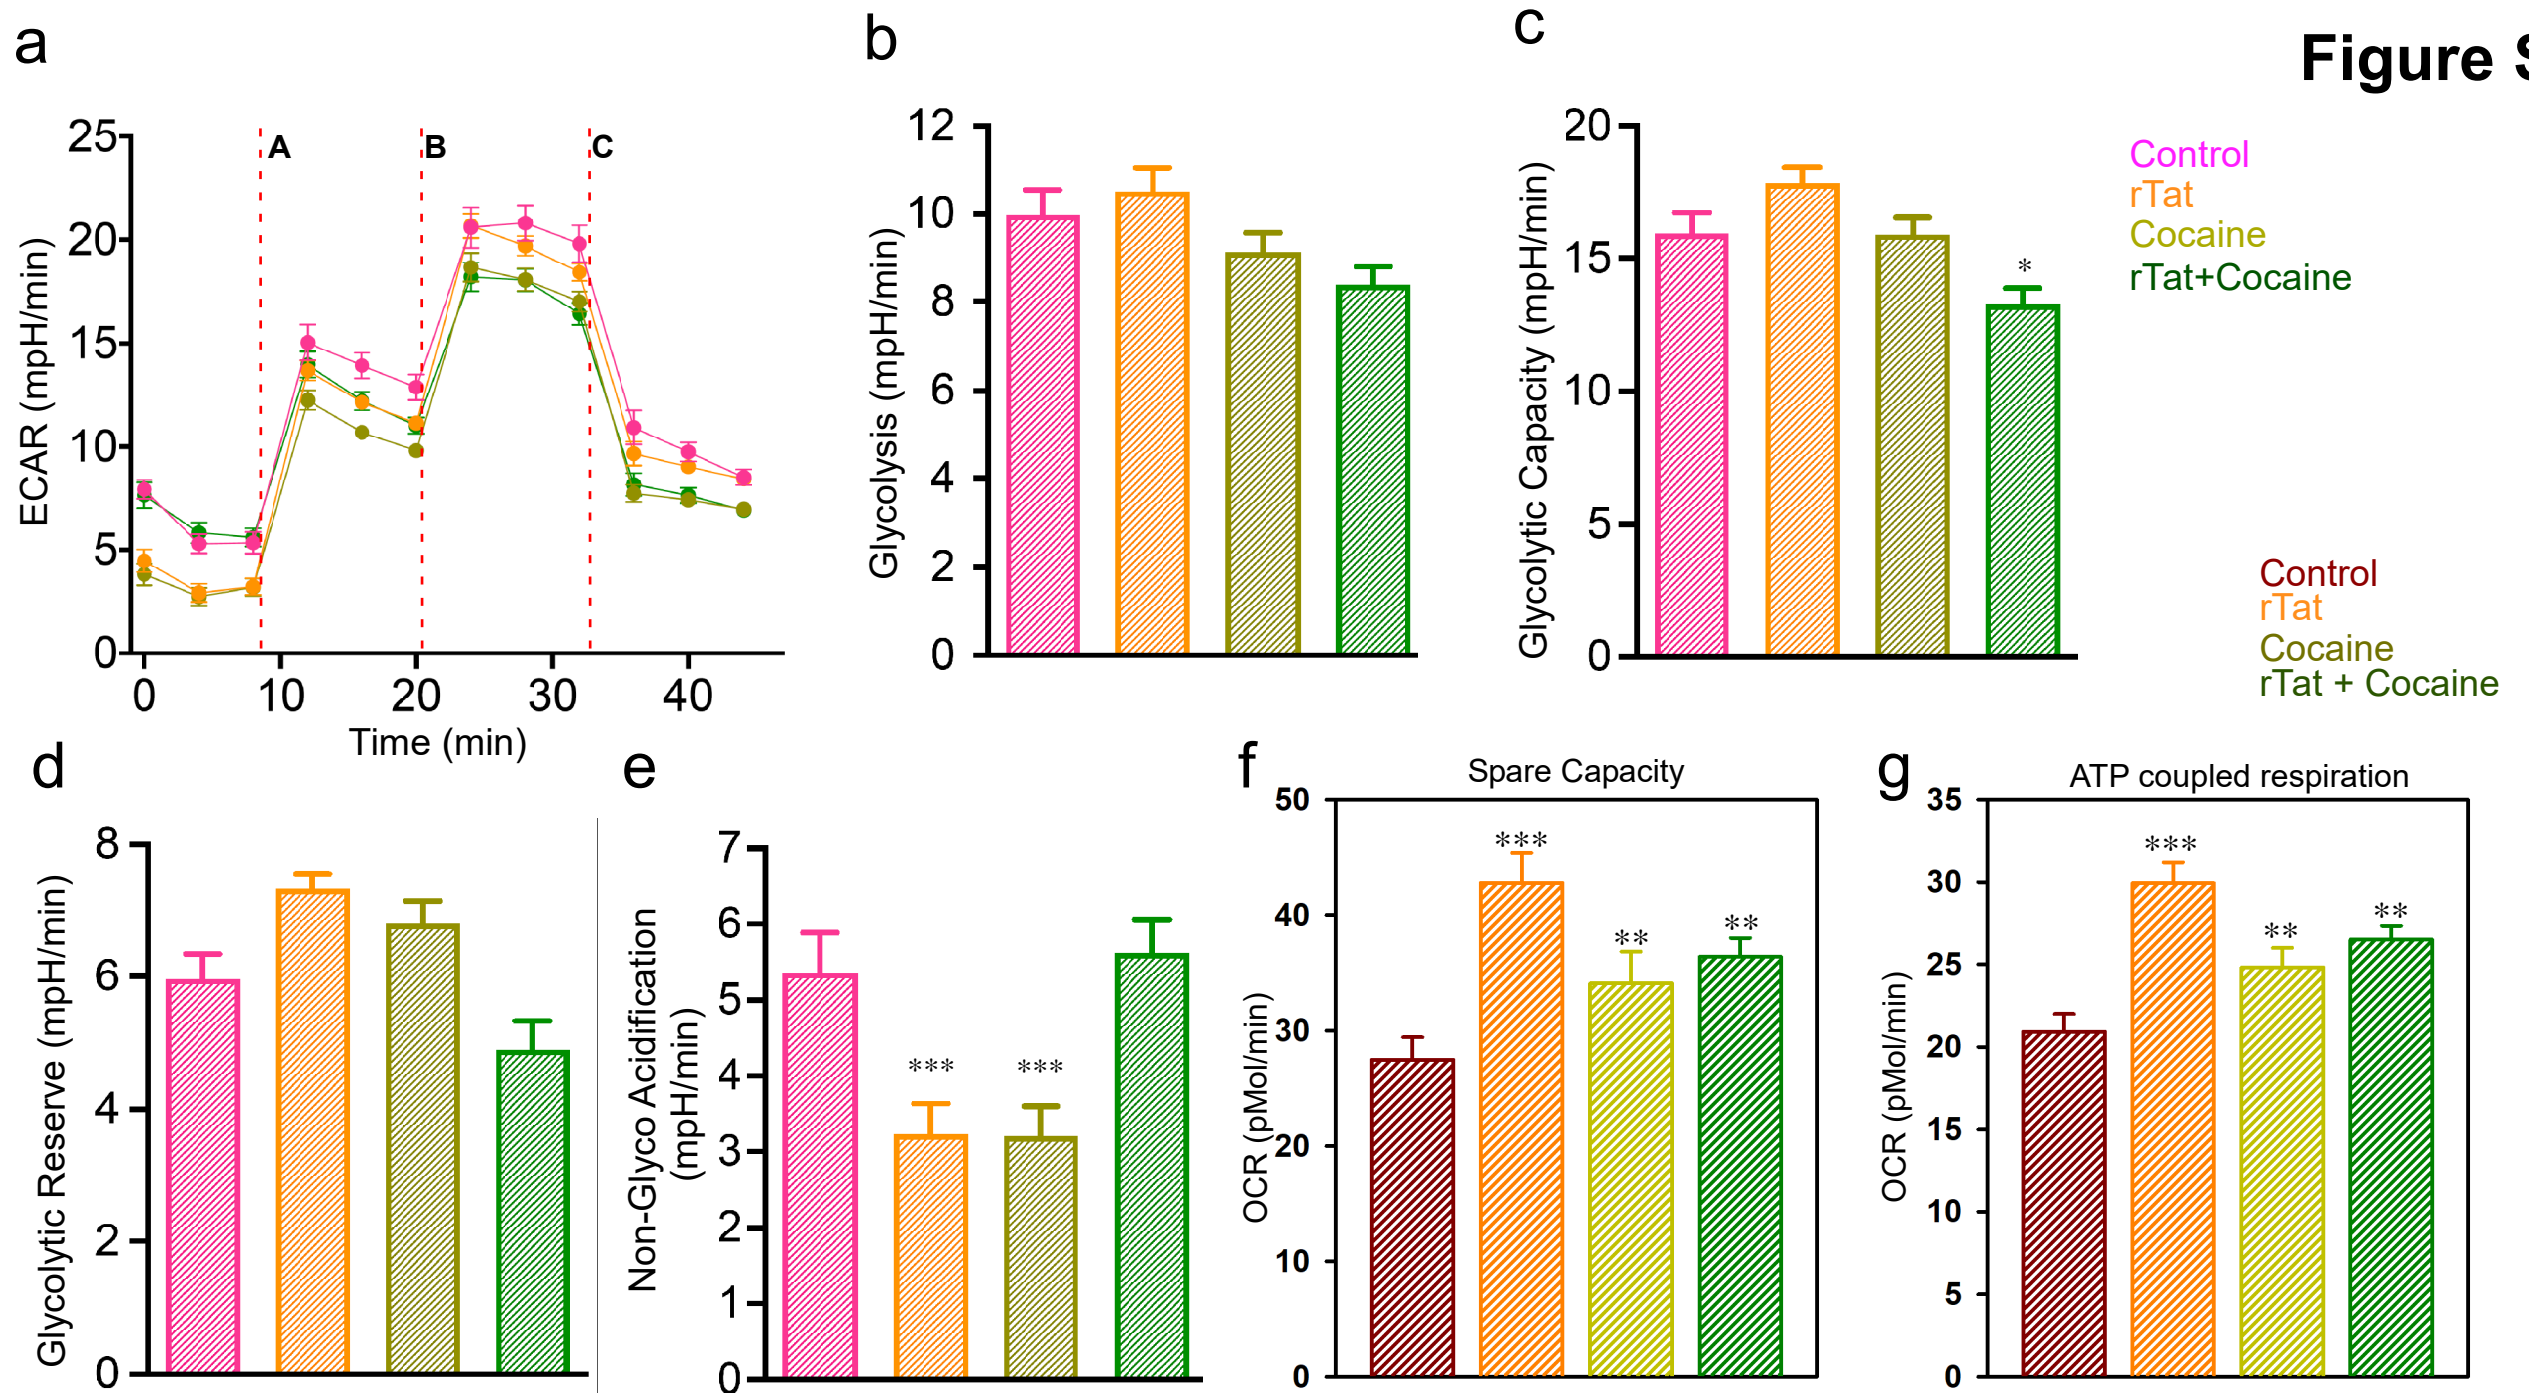

Supplement: 41419_2018_422_MOESM1_ESM.pdf [file 41419_2018_422_MOESM1_ESM.pdf]
